# Supplementary material for: Pan-cancer analysis of homeodomain-containing gene C10 and its carcinogenesis in lung adenocarcinoma
Source: PubMed Central journal article supplement (PMC10781453; doi:10.18632/aging.205348), 2023-12-27
Supplement: aging-15-205348-s002.pdf [file aging-15-205348-s002.pdf]

## SUPPLEMENTARY TABLES

**Supplementary Table 1. The basic information of 46 patients with benign lung disease for HOXC10 in IHC analysis.**

|                  |                       | Cases (n) | Percentage (%) |
|------------------|-----------------------|-----------|----------------|
| Gender           | Male                  | 35        | 76.1           |
|                  | Female                | 11        | 23.9           |
| Age              | <60                   | 34        | 73.9           |
|                  | ≥60                   | 12        | 26.1           |
| Type of diseases | Amyloidosis           | 1         | 2.2            |
|                  | Fungal infection      | 2         | 4.3            |
|                  | Hamartoma             | 3         | 6.5            |
|                  | Hyperplasia           | 19        | 41.3           |
|                  | Metaplasia            | 2         | 4.3            |
|                  | Pneumonia             | 5         | 10.9           |
|                  | Pulmonary bulla       | 5         | 10.9           |
|                  | Sclerosing hemangioma | 2         | 4.3            |
|                  | Tuberculosis          | 7         | 15.2           |

**Supplementary Table 2. The basic information of 408 patients with LUAD for HOXC10 IHC analysis.**

|                  |           | Cases (n) | Percentage (%) |
|------------------|-----------|-----------|----------------|
| Gender           | Female    | 165       | 40.4           |
|                  | Male      | 243       | 59.6           |
| Age              | <60       | 147       | 36.0           |
|                  | ≥60       | 261       | 64.0           |
| Grade            | G1        | 46        | 11.3           |
|                  | G2        | 192       | 47.1           |
|                  | G3        | 170       | 41.7           |
| T classification | T1        | 112       | 27.5           |
|                  | T2        | 210       | 51.5           |
|                  | T3        | 52        | 12.7           |
|                  | T4        | 24        | 5.9            |
| N classification | NA        | 10        | 2.5            |
|                  | N0        | 224       | 54.9           |
|                  | N1        | 88        | 21.6           |
|                  | N2        | 76        | 18.6           |
| M classification | N3        | 7         | 1.7            |
|                  | NA        | 13        | 3.2            |
|                  | M0        | 370       | 90.7           |
| Stage            | M1        | 38        | 9.3            |
|                  | Stage I   | 170       | 41.7           |
|                  | Stage II  | 110       | 27.0           |
|                  | Stage III | 90        | 22.1           |
|                  | Stage IV  | 38        | 9.3            |

\*NA, Not available.
